# Supplementary material
Source: PubMed Central journal article supplement (PMC3033704)
Supplement: pr100927x_si_001.pdf [file pr100927x_si_001.pdf]

# Supporting Information

Lesson from the stoichiometry determination of the cohesin complex; a short protease mediated elution increases the recovery from crosslinked antibody-conjugated beads

*Johann Holzmann (1)\*, Johannes Fuchs (1,2), Peter Pichler (3), Jan-Michael Peters (1) and Karl Mechtler (1,2)*

(1) Research Institute of Molecular Pathology (IMP), 1030 Vienna, Austria

(2) Institute of Molecular Biotechnology (IMBA), 1030 Vienna, Austria

(3) CD-Laboratory for Proteome Analysis, 1030 Vienna, Austria

AUTHOR EMAIL ADDRESS

[johann.holzmann@imp.ac.at](mailto:johann.holzmann@imp.ac.at)

## Table of contents:

|                |                                                                      |       |
|----------------|----------------------------------------------------------------------|-------|
| Figure S1      | Separation of digested BSA using a monolithic column                 | 3     |
| Figure S2      | SDS-PAGE of cohesin and APC/C purifications                          | 4     |
| Figure S3      | Relative quantification of cohesin subunits                          | 5     |
| Figure S4      | Relative quantification of APC/C subunits                            | 6     |
| Figure S5      | XICs of $\alpha$ APC3 rabbit antibody peptides                       | 7     |
| Figure S6      | Workflow of the EtEP strategy                                        | 8     |
| Figure S7      | Calibration curves of STAG1 specific peptides                        | 9     |
| Figure S8      | Absolute quantification cohesin – peptide level                      | 10    |
| Figure S9      | LC-SRM chromatogram of cohesin quantification                        | 10    |
| Figure S10     | LC-SRM chromatogram of STAG1 specific peptide EDLLVLR                | 11    |
| Table S1       | SRM transitions used for absolute quantification of cohesin peptides | 12-14 |
| Table S2       | Protein identified from 1, 4 and 16 h of pre-digestion (cohesin)     | 15-16 |
| Table S3       | Protein identified from 1, 4 and 16 h of pre-digestion (APC/C)       | 17-21 |
| Table S4       | Proteins identified from 15, 30 and 60 min LysC pre-digestion        | 22    |
| Figures S11-13 | Results obtained using trypsin to perform protease elution           | 23-24 |

**Figure S1**

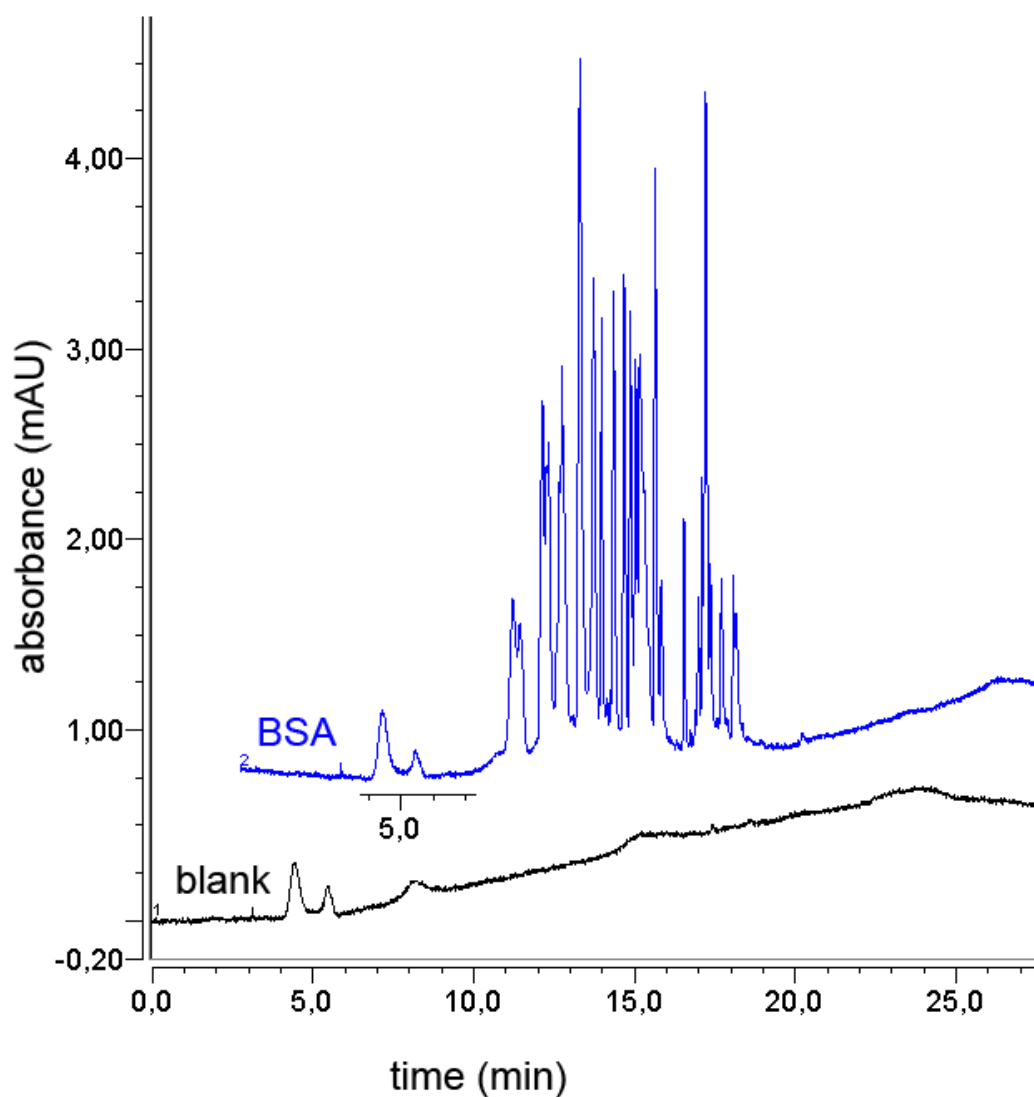

UV chromatogram of 1 pmol digested BSA (blue) and blank (black) separated on a Dionex Ultimate nanoHPLC equipped with a 200  $\mu$ m I.D. monolithic column (PepSwift from Dionex, Amsterdam, The Netherlands). For better illustration chromatograms are displayed with a 5% time and a 15% signal offset.

**Figure S2**

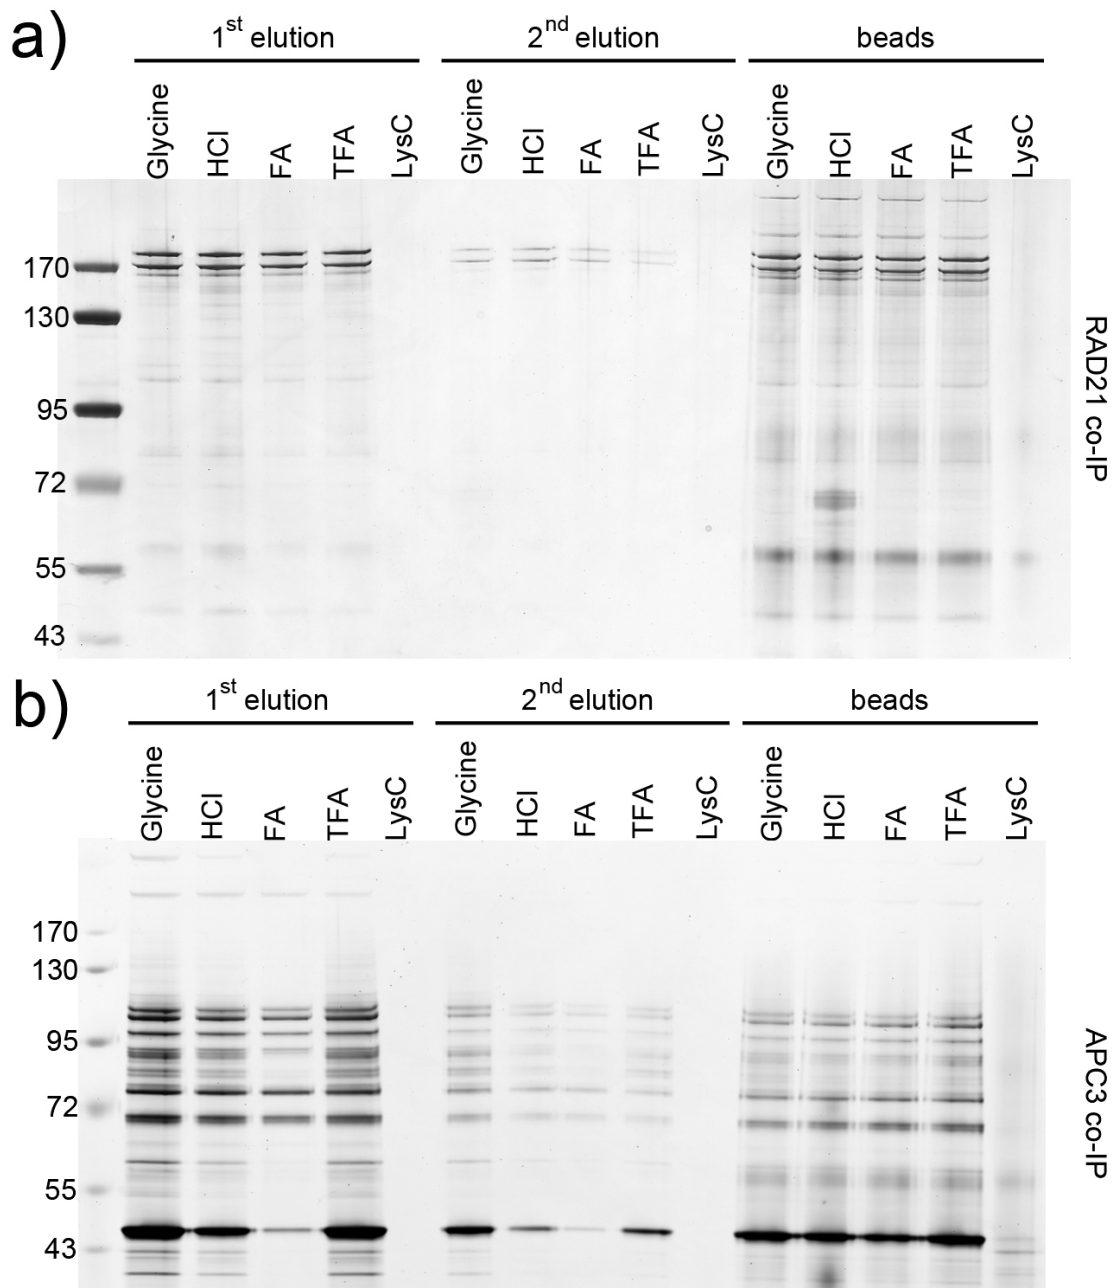

SDS-PAGE of cohesin and APC/C purifications eluted using different reagents. After incubation with S-20 HeLa extract and a total of 7 washing steps, the 30  $\mu$ l antibody beads were eluted with 60  $\mu$ l of 100 mM glycine pH 2.0, 100 mM HCl, 100 mM FA, 100 mM TFA and by incubation with 500 ng LysC after re-suspension of beads in 60  $\mu$ l 0.5 M TEAB, respectively. 50% of the eluate was used for labelfree quantification on Orbitrap XL and 50% was used for SDS-PAGE. In lanes denoted “beads”, the remaining proteins bound to beads after 2-step elution were eluted by boiling in Laemmli-buffer for 5 min at 95°C.

**Figure S3**

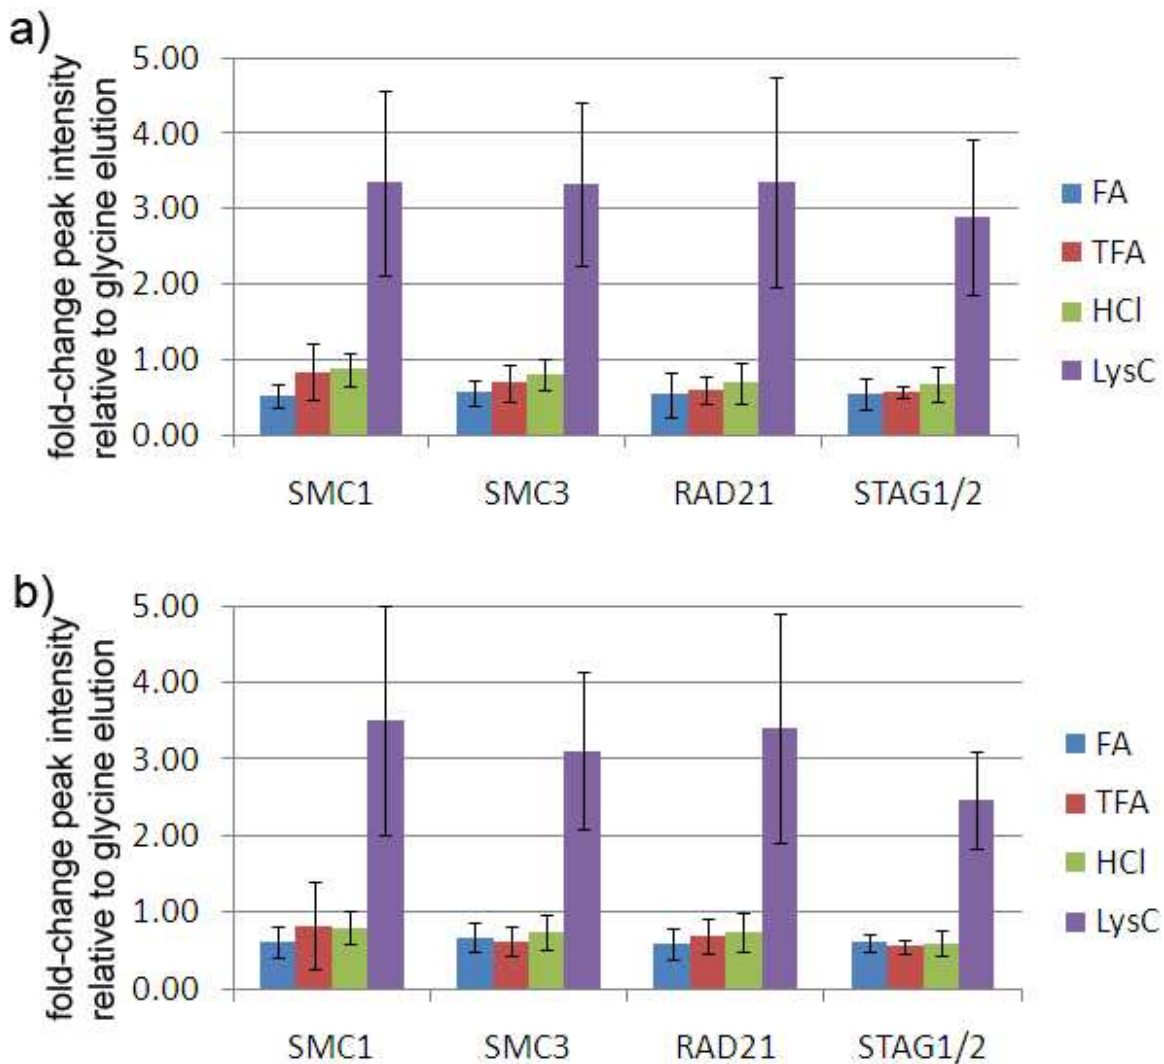

Label-free quantification of cohesin subunits by XIC from preparations using different elution protocols relative to glycine elution. Cohesin was purified by immunoadsorption and eluted using 5 different elution protocols. XICs were extracted using Proteome Discoverer Software (v 1.2) and peptides containing no chemical modification (such as methionine oxidation or S,T,Y-phosphorylation) were quantified relative to the glycine elution. a) Technical repeat 1 and b) technical repeat 2. Shown are the mean  $\pm$  S.D. of relative measurements of peptides that were identified in all 5 preparations. The minimum number of peptides per subunit used for quantification was 5.

Figure S4

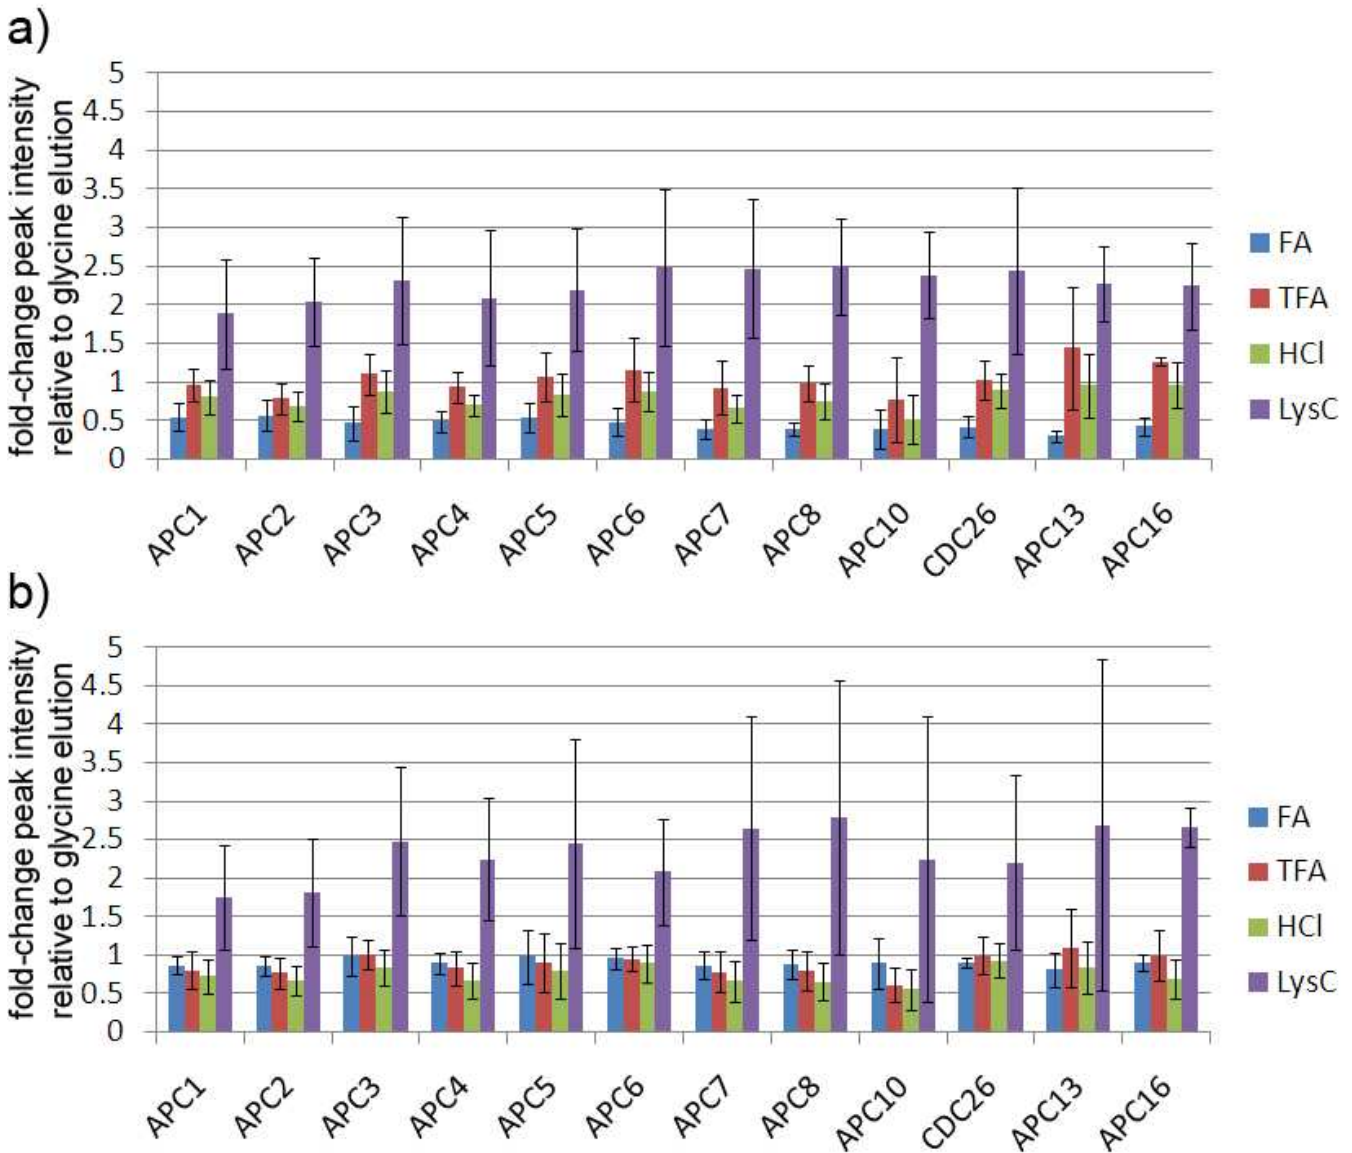

Labelfree quantification of APC/C subunits by XIC from preparations using different elution protocols relative to glycine elution. APC/C was purified by immunoadsorption and eluted using 5 different elution protocols. XICs were extracted using Proteome Discoverer Software (v 1.2) and peptides containing no chemical modification (such as methionine oxidation or S,T,Y-phosphorylation) were quantified relative to the glycine elution. a) Technical repeat 1 and b) technical repeat 2. Shown are the mean  $\pm$  S.D. of relative measurements of peptides that were identified in all 5 preparations. The minimum number of peptides per subunit used for quantification was 3.

**Figure S5**

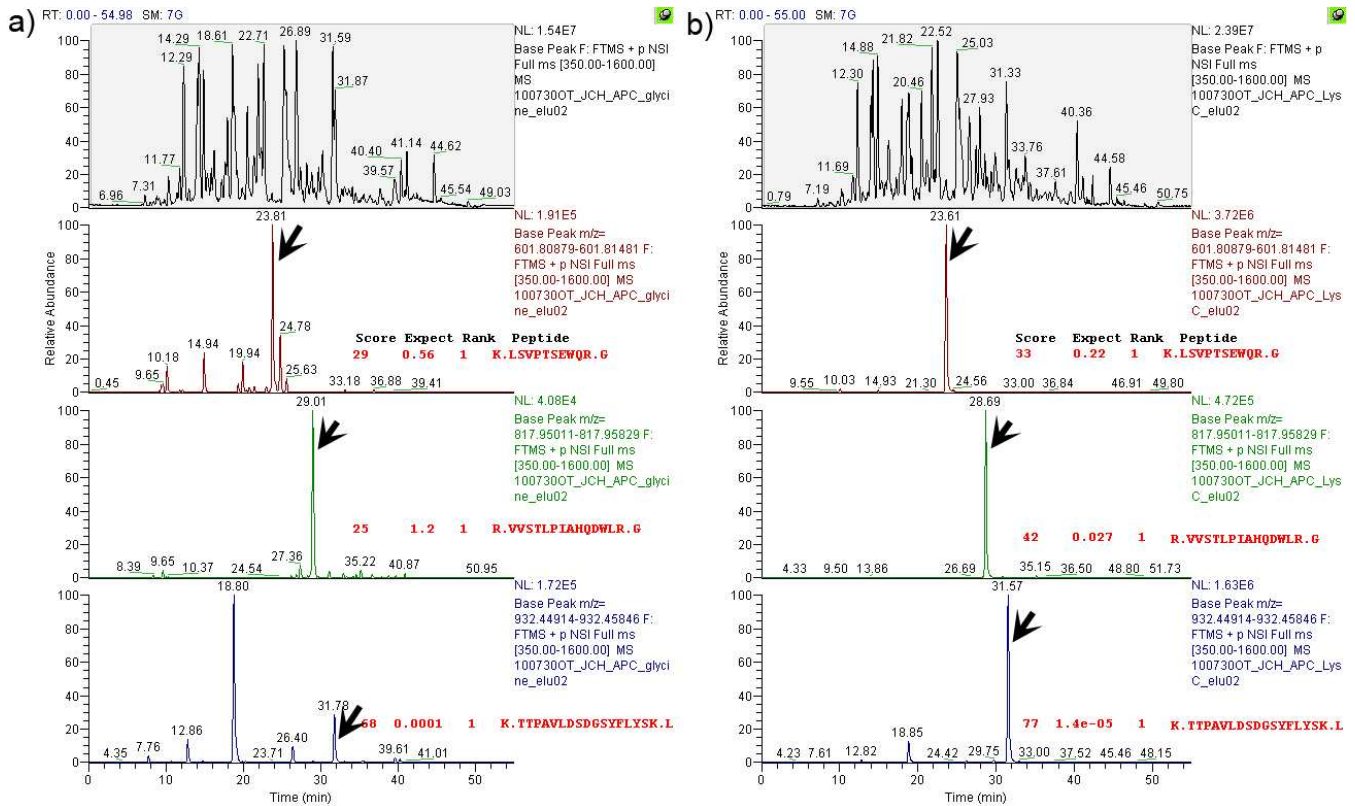

Base peak chromatogram and XICs of  $\alpha$ APC3 rabbit antibody peptides identified after glycine elution (a) compared to 1 hour LysC elution (b). A total of 7 antibody peptides stemming from the Fc region were identified in LysC elution and 3 were identified after glycine elution, 3 were in common. XICs of these 3 peptides were extracted using Xcalibur software (version 2.0.7) with a mass tolerance of 5 ppm. XICs of peptides after LysC elution were on average 20-fold more intense than after glycine elution. In red, score, expect, rank and peptide sequence are given from the Mascot result.

**Figure S6**

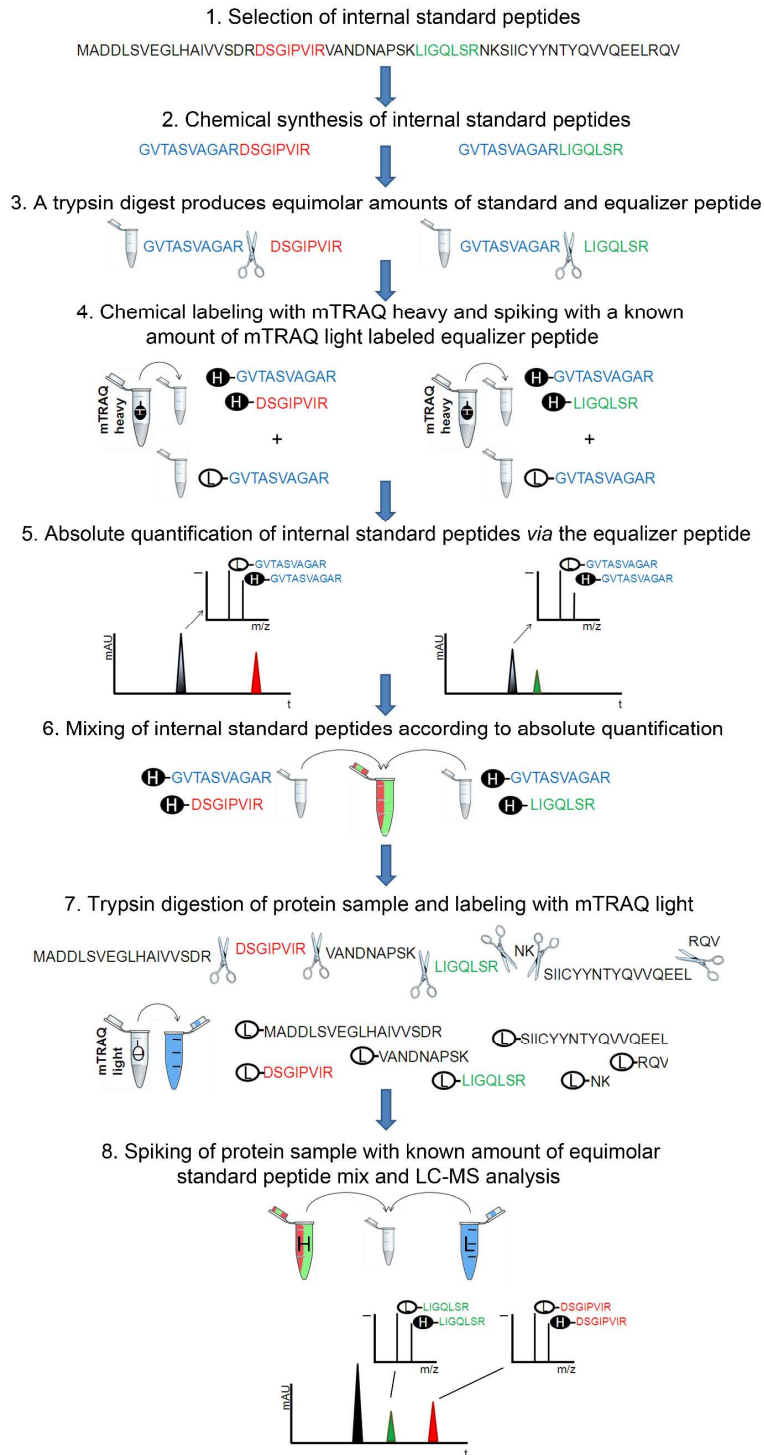

Workflow of the Equimolarity through Equalizer Peptide strategy (EtEP) for the generation of an equimolar mixture of internal reference peptides.



Figure S7

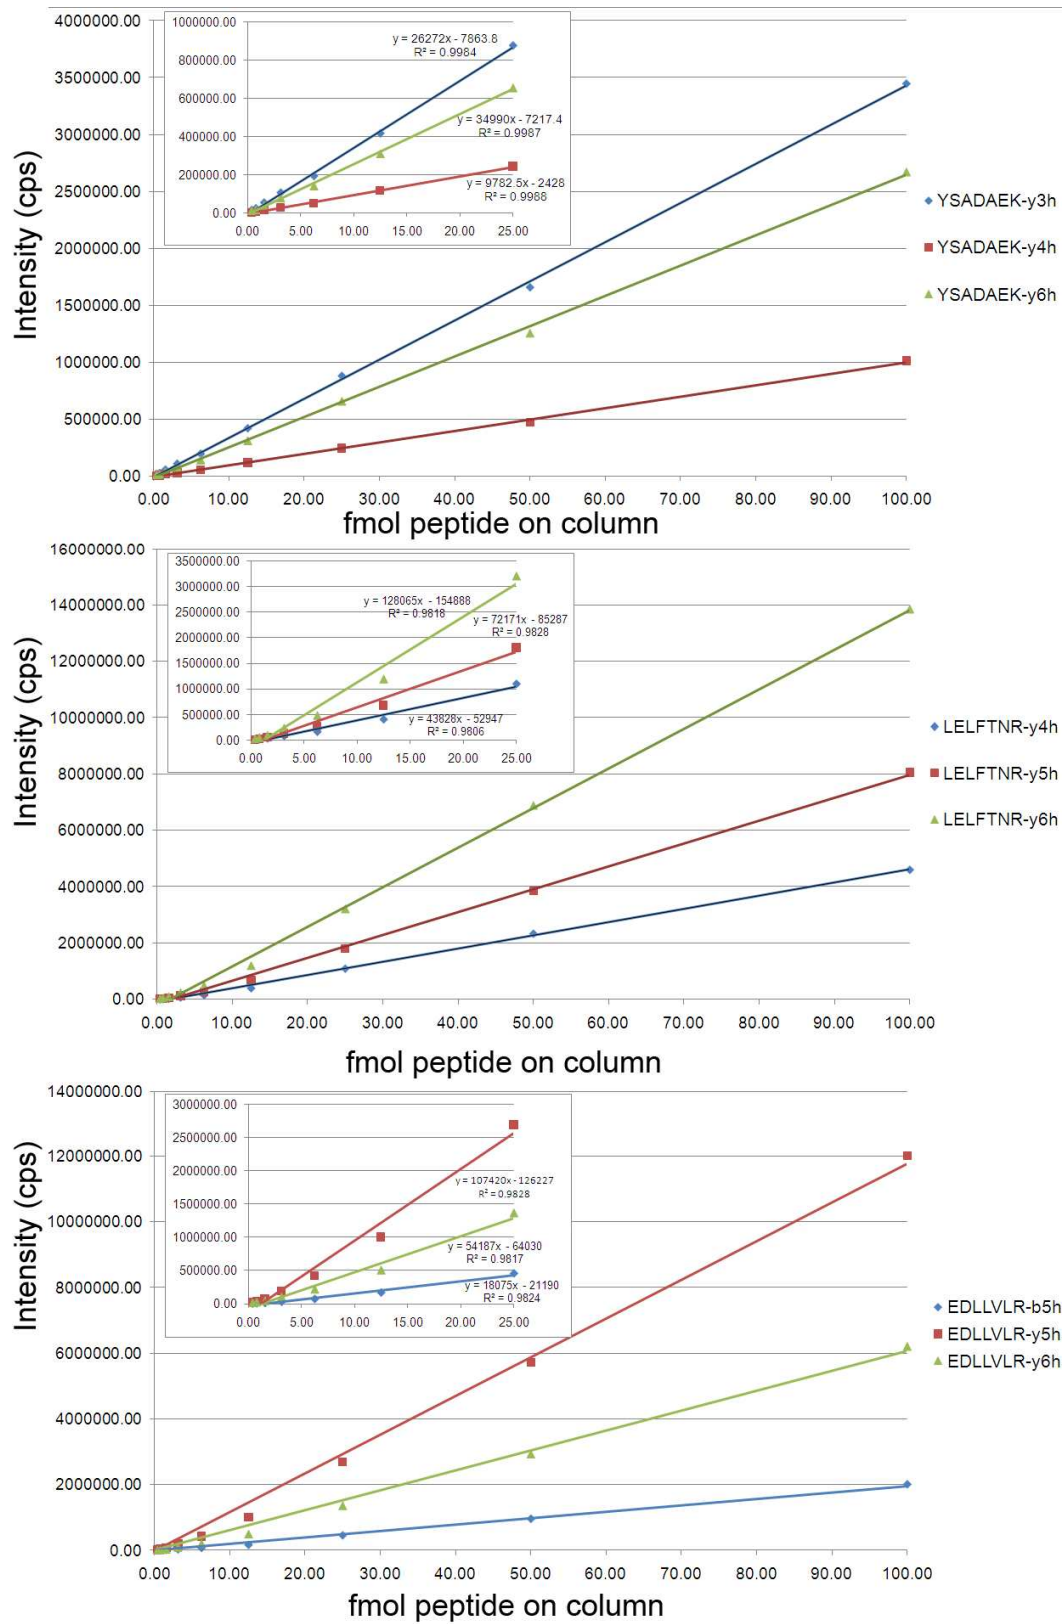

Calibration curves of STAG1 specific peptides. Peptide amounts from 390 amol to 100 fmol were measured in triplicate by scheduled SRM on a 5500 QTRAP instrument.

**Figure S8**

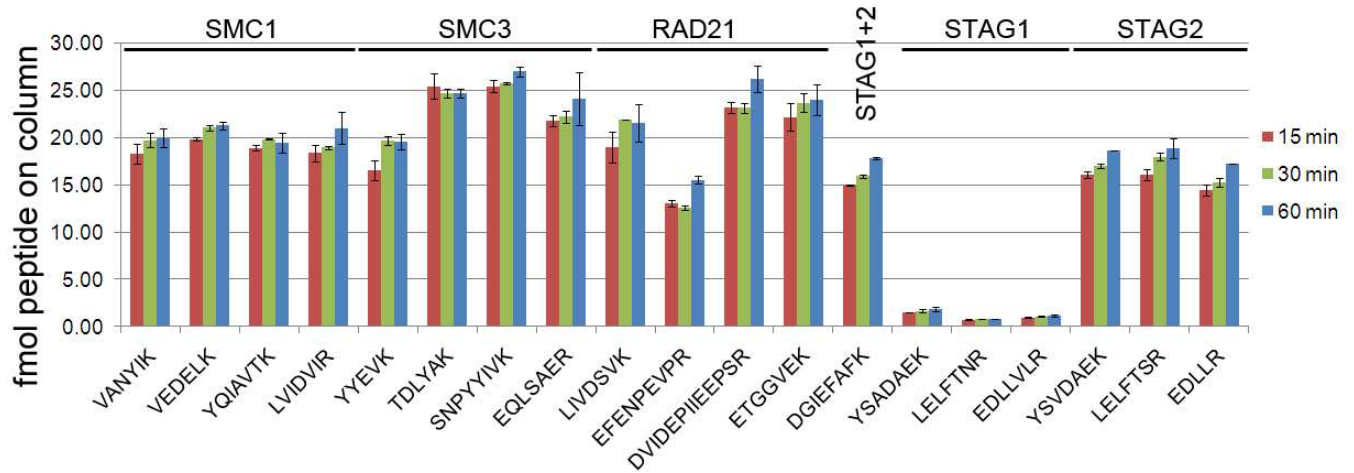

Absolute quantification of SMC1, SMC3, RAD21 and STAG1, STAG2 peptides using scheduled SRM on a 5500 QTRAP after 15, 30 and 60 min LysC elution. Measurements are mean  $\pm$  S.D. of duplicate measurements.

**Figure S9**

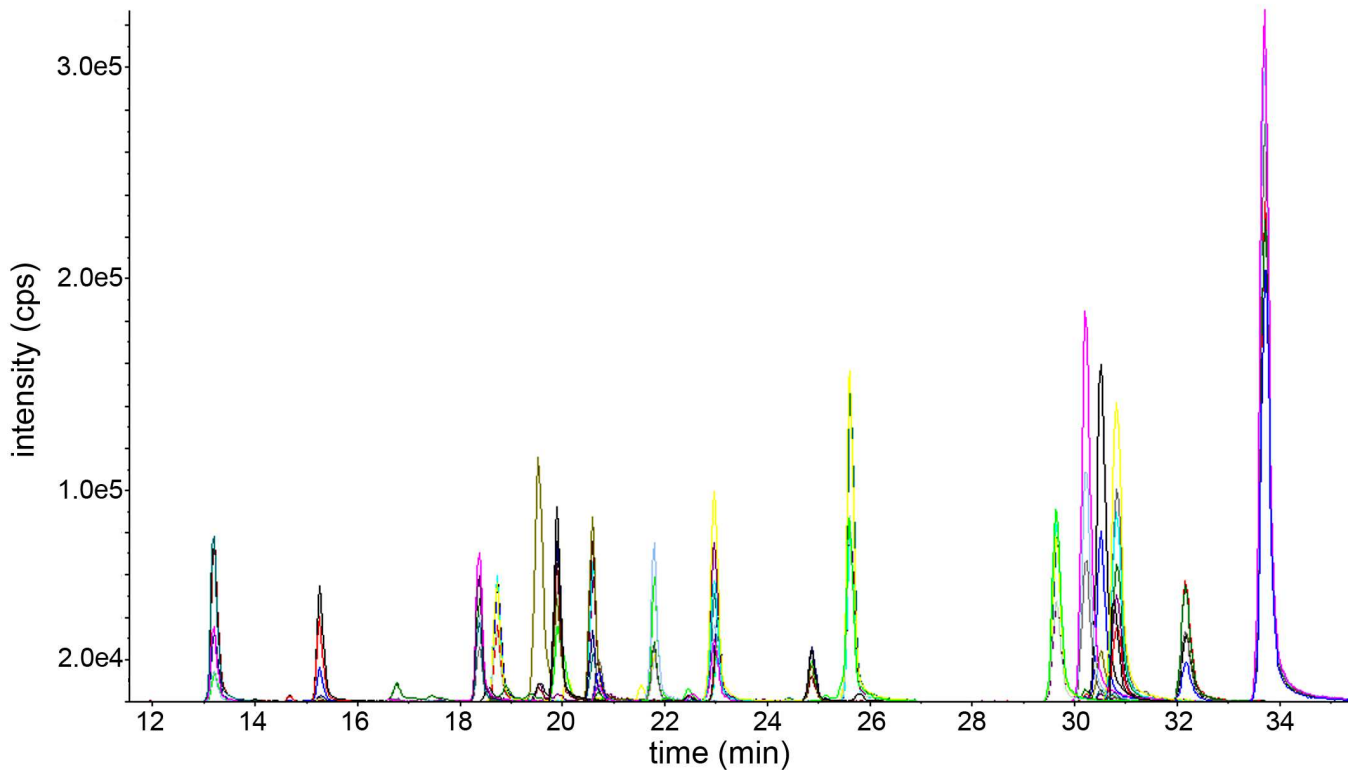

LC-SRM chromatogram of cohesin peptides spiked with 10 fmol internal reference peptides. A target scan time of 2 sec in the scheduled SRM method led to at least 12 data points across the eluting peaks.

Figure S10

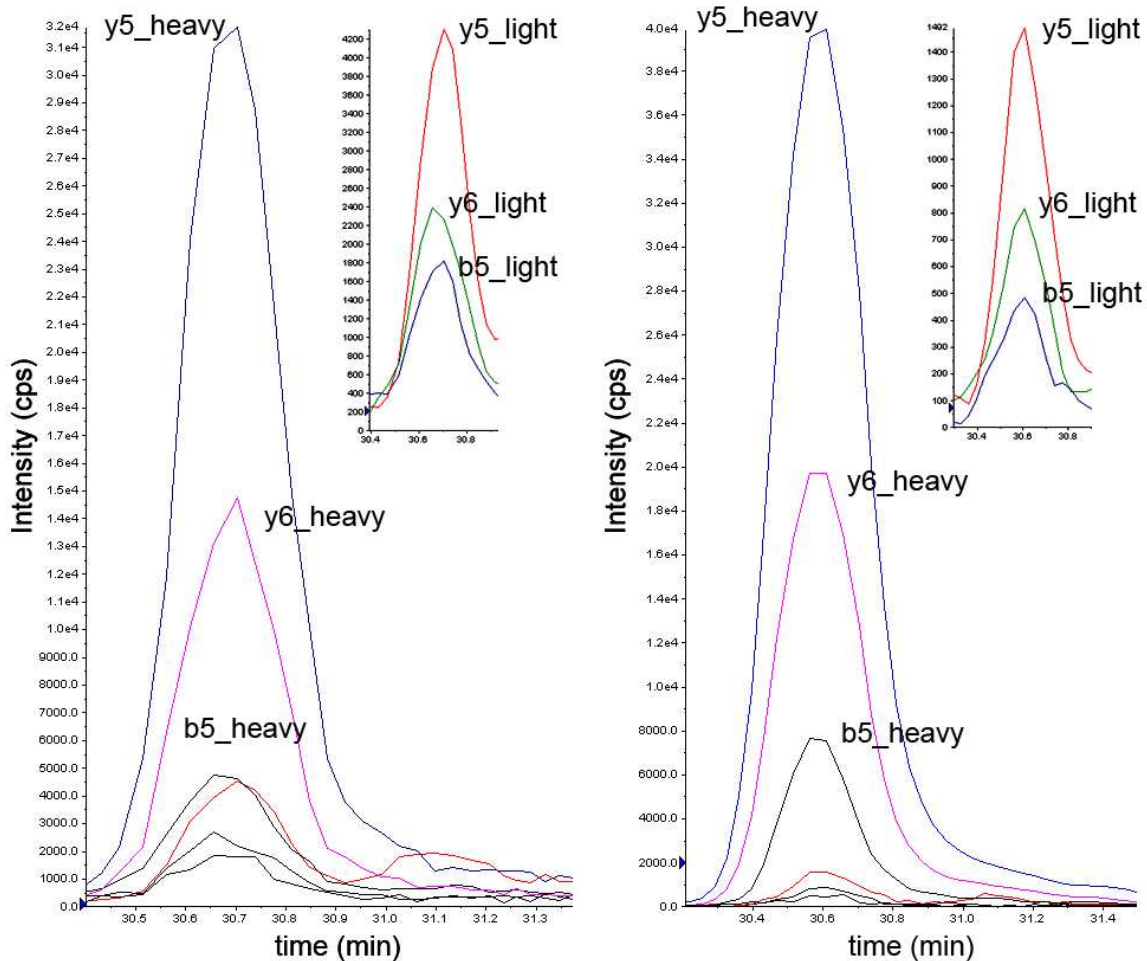

LC-SRM chromatogram of STAG1 specific peptide EDLLVLR after (a) 30 min LysC elution and (b) HCl elution. Transitions 499.3→710.4 (b5 fragment) after HCl elution was below our intensity threshold of 500 cps. 10 fmol internal reference peptides spiked.

**Table S1**

| Q1 [m/z] | Q3 [m/z] | t [min] | Fragment          | Protein | CE | CXP |
|----------|----------|---------|-------------------|---------|----|-----|
| 607.84   | 656.39   | 35      | DGIEFAFK-y4h      | STAG1+2 | 36 | 22  |
| 603.83   | 652.39   | 35      | DGIEFAFK-y4L      | STAG1+2 | 36 | 22  |
| 607.84   | 785.43   | 35      | DGIEFAFK-y5h      | STAG1+2 | 35 | 27  |
| 603.83   | 781.43   | 35      | DGIEFAFK-y5L      | STAG1+2 | 35 | 27  |
| 607.84   | 955.54   | 35      | DGIEFAFK-y7h      | STAG1+2 | 35 | 33  |
| 603.83   | 951.54   | 35      | DGIEFAFK-y7L      | STAG1+2 | 35 | 33  |
| 828.43   | 587.2    | 32.2    | DVIDEPIIEEPSR-b4h | RAD21   | 46 | 20  |
| 826.43   | 583.2    | 32.2    | DVIDEPIIEEPSR-b4L | RAD21   | 46 | 20  |
| 828.43   | 716.2    | 32.2    | DVIDEPIIEEPSR-b5h | RAD21   | 46 | 25  |
| 826.43   | 712.2    | 32.2    | DVIDEPIIEEPSR-b5L | RAD21   | 46 | 25  |
| 828.43   | 940.51   | 32.2    | DVIDEPIIEEPSR-y8h | RAD21   | 48 | 32  |
| 826.43   | 940.51   | 32.2    | DVIDEPIIEEPSR-y8L | RAD21   | 48 | 32  |
| 789.49   | 502.3    | 22.3    | EDLLR-b3h         | STAG2   | 58 | 17  |
| 785.49   | 498.3    | 22.3    | EDLLR-b3L         | STAG2   | 58 | 17  |
| 789.49   | 615.2    | 22.3    | EDLLR-b4h         | STAG2   | 57 | 21  |
| 785.49   | 611.2    | 22.3    | EDLLR-b4L         | STAG2   | 57 | 21  |
| 789.49   | 516.31   | 22.3    | EDLLR-y4h         | STAG2   | 58 | 18  |
| 785.49   | 516.31   | 22.3    | EDLLR-y4L         | STAG2   | 58 | 18  |
| 501.31   | 714.42   | 33.1    | EDLLVLR-b5h       | STAG1   | 35 | 25  |
| 499.31   | 710.42   | 33.1    | EDLLVLR-b5L       | STAG1   | 35 | 25  |
| 501.31   | 613.3    | 33.1    | EDLLVLR-y5h       | STAG1   | 35 | 21  |
| 499.31   | 613.3    | 33.1    | EDLLVLR-y5L       | STAG1   | 35 | 21  |
| 501.31   | 728.3    | 33.1    | EDLLVLR-y6h       | STAG1   | 34 | 25  |
| 499.31   | 728.3    | 33.1    | EDLLVLR-y6L       | STAG1   | 34 | 25  |
| 630.82   | 664.2    | 24.7    | EFENPEVPR-b4h     | RAD21   | 39 | 23  |
| 628.82   | 660.2    | 24.7    | EFENPEVPR-b4L     | RAD21   | 39 | 23  |
| 630.82   | 711.4    | 24.7    | EFENPEVPR-y6h     | RAD21   | 40 | 25  |
| 628.82   | 711.4    | 24.7    | EFENPEVPR-y6L     | RAD21   | 40 | 25  |
| 630.82   | 987.2    | 24.7    | EFENPEVPR-y8h     | RAD21   | 36 | 34  |
| 628.82   | 987.2    | 24.7    | EFENPEVPR-y8L     | RAD21   | 36 | 34  |
| 976.52   | 802.3    | 16.3    | EQLSAER-b6h       | SMC3    | 66 | 28  |
| 972.52   | 798.3    | 16.3    | EQLSAER-b6L       | SMC3    | 66 | 28  |
| 976.52   | 575.31   | 16.3    | EQLSAER-y5h       | SMC3    | 69 | 20  |
| 972.52   | 575.31   | 16.3    | EQLSAER-y5L       | SMC3    | 69 | 20  |
| 976.52   | 703.2    | 16.3    | EQLSAER-y6h       | SMC3    | 69 | 24  |
| 972.52   | 703.2    | 16.3    | EQLSAER-y6L       | SMC3    | 69 | 24  |
| 504.28   | 576.35   | 14.6    | ETGGVEK-y4h       | RAD21   | 32 | 20  |
| 500.28   | 572.35   | 14.6    | ETGGVEK-y4L       | RAD21   | 32 | 20  |
| 504.28   | 633.2    | 14.6    | ETGGVEK-y5h       | RAD21   | 32 | 22  |
| 500.28   | 629.3    | 14.6    | ETGGVEK-y5L       | RAD21   | 32 | 22  |
| 504.28   | 734.3    | 14.6    | ETGGVEK-y6h       | RAD21   | 32 | 25  |
| 500.28   | 730.3    | 14.6    | ETGGVEK-y6L       | RAD21   | 32 | 25  |
| 518.8    | 537.28   | 32.8    | LELFTNR-y4h       | STAG1   | 31 | 19  |
| 516.8    | 537.28   | 32.8    | LELFTNR-y4L       | STAG1   | 31 | 19  |
| 518.8    | 650.36   | 32.8    | LELFTNR-y5h       | STAG1   | 31 | 22  |
| 516.8    | 650.36   | 32.8    | LELFTNR-y5L       | STAG1   | 31 | 22  |

|        |        |      |              |       |    |    |
|--------|--------|------|--------------|-------|----|----|
| 518.8  | 779.4  | 32.8 | LELFTNR-y6h  | STAG1 | 31 | 27 |
| 516.8  | 779.4  | 32.8 | LELFTNR-y6L  | STAG1 | 31 | 27 |
| 505.29 | 510.27 | 33.5 | LELFTSR-y4h  | STAG2 | 31 | 18 |
| 503.29 | 510.27 | 33.5 | LELFTSR-y4L  | STAG2 | 31 | 18 |
| 505.29 | 623.35 | 33.5 | LELFTSR-y5h  | STAG2 | 31 | 21 |
| 503.29 | 623.35 | 33.5 | LELFTSR-y5L  | STAG2 | 31 | 21 |
| 505.29 | 752.39 | 33.5 | LELFTSR-y6h  | STAG2 | 32 | 26 |
| 503.29 | 752.39 | 33.5 | LELFTSR-y6L  | STAG2 | 32 | 26 |
| 531.34 | 477.32 | 27.5 | LIVDSVK-y3h  | SMC3  | 33 | 16 |
| 527.34 | 473.32 | 27.5 | LIVDSVK-y3L  | SMC3  | 33 | 16 |
| 531.34 | 592.34 | 27.5 | LIVDSVK-y4h  | SMC3  | 34 | 20 |
| 527.34 | 588.34 | 27.5 | LIVDSVK-y4L  | SMC3  | 34 | 20 |
| 531.34 | 804.49 | 27.5 | LIVDSVK-y6h  | SMC3  | 33 | 28 |
| 527.34 | 800.49 | 27.5 | LIVDSVK-y6L  | SMC3  | 33 | 28 |
| 486.32 | 585.2  | 36.6 | LVIDVIR-b4h  | SMC1  | 29 | 20 |
| 484.62 | 581.2  | 36.6 | LVIDVIR-b4L  | SMC1  | 29 | 20 |
| 486.32 | 387.27 | 36.6 | LVIDVIR-y3h  | SMC1  | 29 | 13 |
| 484.62 | 387.27 | 36.6 | LVIDVIR-y3L  | SMC1  | 29 | 13 |
| 486.32 | 714.45 | 36.6 | LVIDVIR-y6h  | SMC1  | 27 | 25 |
| 484.62 | 714.45 | 36.6 | LVIDVIR-y6L  | SMC1  | 27 | 25 |
| 636.37 | 769.4  | 26.8 | SNPYYIVK-b5h | SMC3  | 39 | 27 |
| 632.36 | 765.4  | 26.8 | SNPYYIVK-b5L | SMC3  | 39 | 27 |
| 636.37 | 666.4  | 26.8 | SNPYYIVK-y4h | SMC3  | 39 | 23 |
| 632.36 | 662.4  | 26.8 | SNPYYIVK-y4L | SMC3  | 39 | 23 |
| 636.37 | 926.55 | 26.8 | SNPYYIVK-y6h | SMC3  | 39 | 32 |
| 632.36 | 922.55 | 26.8 | SNPYYIVK-y6L | SMC3  | 39 | 32 |
| 499.79 | 525.32 | 20.3 | TDLYAK-y3h   | SMC3  | 30 | 18 |
| 495.79 | 521.32 | 20.3 | TDLYAK-y3L   | SMC3  | 30 | 18 |
| 499.79 | 638.4  | 20.3 | TDLYAK-y4h   | SMC3  | 30 | 22 |
| 495.79 | 634.4  | 20.3 | TDLYAK-y4L   | SMC3  | 30 | 22 |
| 499.79 | 753.4  | 20.3 | TDLYAK-y5h   | SMC3  | 30 | 26 |
| 495.79 | 749.4  | 20.3 | TDLYAK-y5L   | SMC3  | 30 | 26 |
| 498.31 | 592.2  | 23.4 | VANYIK-b4h   | SMC1  | 30 | 20 |
| 494.3  | 588.2  | 23.4 | VANYIK-b4L   | SMC1  | 30 | 20 |
| 498.31 | 681.41 | 23.4 | VANYIK-y4h   | SMC1  | 30 | 23 |
| 494.3  | 677.41 | 23.4 | VANYIK-y4L   | SMC1  | 30 | 23 |
| 498.31 | 752.44 | 23.4 | VANYIK-y5h   | SMC1  | 27 | 26 |
| 494.3  | 748.44 | 23.4 | VANYIK-y5L   | SMC1  | 27 | 26 |
| 510.79 | 533.34 | 21.5 | VEDELK-y3h   | SMC1  | 29 | 18 |
| 506.79 | 529.34 | 21.5 | VEDELK-y3L   | SMC1  | 29 | 18 |
| 510.79 | 648.37 | 21.5 | VEDELK-y4h   | SMC1  | 29 | 22 |
| 506.79 | 644.37 | 21.5 | VEDELK-y4L   | SMC1  | 29 | 22 |
| 510.79 | 777.2  | 21.5 | VEDELK-y5h   | SMC1  | 29 | 27 |
| 506.79 | 773.2  | 21.5 | VEDELK-y5L   | SMC1  | 29 | 27 |
| 555.84 | 620.3  | 24.7 | YQIAVTK-b4h  | SMC1  | 34 | 21 |
| 551.84 | 616.3  | 24.7 | YQIAVTK-b4L  | SMC1  | 34 | 21 |
| 555.84 | 675.45 | 24.7 | YQIAVTK-y5h  | SMC1  | 32 | 23 |
| 551.84 | 671.45 | 24.7 | YQIAVTK-y5L  | SMC1  | 32 | 23 |
| 555.84 | 803.51 | 24.7 | YQIAVTK-y6h  | SMC1  | 32 | 28 |

|        |        |      |              |       |    |    |
|--------|--------|------|--------------|-------|----|----|
| 551.84 | 799.51 | 24.7 | YQIAVTK-y6L  | SMC1  | 32 | 28 |
| 536.28 | 491.29 | 16.8 | YSADA EK-y3h | STAG1 | 35 | 17 |
| 532.28 | 487.29 | 16.8 | YSADA EK-y3L | STAG1 | 35 | 17 |
| 536.28 | 606.32 | 16.8 | YSADA EK-y4h | STAG1 | 34 | 21 |
| 532.28 | 602.32 | 16.8 | YSADA EK-y4L | STAG1 | 34 | 21 |
| 536.28 | 764.39 | 16.8 | YSADA EK-y6h | STAG1 | 35 | 26 |
| 532.28 | 760.39 | 16.8 | YSADA EK-y6L | STAG1 | 35 | 26 |
| 550.3  | 491.29 | 20   | YSVDA EK-y3h | STAG2 | 33 | 17 |
| 546.29 | 487.29 | 20   | YSVDA EK-y3L | STAG2 | 33 | 17 |
| 550.3  | 606.2  | 20   | YSVDA EK-y4h | STAG2 | 35 | 21 |
| 546.29 | 602.2  | 20   | YSVDA EK-y4L | STAG2 | 35 | 21 |
| 550.3  | 792.42 | 20   | YSVDA EK-y6h | STAG2 | 31 | 27 |
| 546.29 | 788.42 | 20   | YSVDA EK-y6L | STAG2 | 31 | 27 |
| 495.28 | 600.2  | 22.3 | YYEVK-b3h    | SMC3  | 32 | 21 |
| 491.27 | 596.2  | 22.3 | YYEVK-b3L    | SMC3  | 32 | 21 |
| 495.28 | 390.28 | 22.3 | YYEVK-y2h    | SMC3  | 30 | 13 |
| 491.27 | 386.28 | 22.3 | YYEVK-y2L    | SMC3  | 30 | 13 |
| 495.28 | 682.39 | 22.3 | YYEVK-y4h    | SMC3  | 30 | 24 |
| 491.27 | 678.39 | 22.3 | YYEVK-y4L    | SMC3  | 30 | 24 |

SRM transitions used for absolute quantification of cohesin peptides.

**Table S2**

| Protein                                                                                                    | Accession Number        | Trypsin   |           |           | LysC      |           |           |
|------------------------------------------------------------------------------------------------------------|-------------------------|-----------|-----------|-----------|-----------|-----------|-----------|
|                                                                                                            |                         | 1 h       | 4 h       | 16 h      | 1 h       | 4 h       | 16 h      |
| <b>Structural maintenance of chromosomes protein 3</b>                                                     | <b>IPI00219420</b>      | <b>55</b> | <b>42</b> | <b>29</b> | <b>55</b> | <b>57</b> | <b>46</b> |
| <b>Structural maintenance of chromosomes protein 1A</b>                                                    | <b>IPI00291939</b>      | <b>56</b> | <b>43</b> | <b>30</b> | <b>57</b> | <b>53</b> | <b>51</b> |
| <b>cohesin subunit SA-2 isoform a</b>                                                                      | <b>IPI00470883</b>      | <b>26</b> | <b>26</b> | <b>13</b> | <b>31</b> | <b>29</b> | <b>19</b> |
| <b>Double-strand-break repair protein rad21 homolog</b>                                                    | <b>IPI00006715</b>      | <b>21</b> | <b>17</b> | <b>9</b>  | <b>26</b> | <b>22</b> | <b>20</b> |
| Isoform 1 of Myosin-9                                                                                      | IPI00019502             | 5         | 38        | 24        | 5         | 10        | 10        |
| Isoform 1 of Protein-L-isoaspartate(D-aspartate) O-methyltransferase                                       | IPI00411680             | 7         | 8         | 8         | 7         | 8         | 6         |
| Isoform 1 of Heat shock cognate 71 kDa protein                                                             | IPI00003865             | 10        | 16        | 11        | 11        | 12        | 10        |
| Isoform 1 of Gephyrin                                                                                      | IPI00016006 (+1)        | 8         | 17        | 8         | 12        | 12        | 10        |
| Isoform 1 of Protein-L-isoaspartate O-methyltransferase domain-containing protein 2                        | IPI00884185             | 5         | 12        | 11        | 7         | 9         | 9         |
| Actin, cytoplasmic 1                                                                                       | IPI00021439 (+4)        | 6         | 9         | 10        | 8         | 8         | 8         |
| 2-oxoglutarate dehydrogenase, mitochondrial                                                                | IPI00098902             | 7         | 8         | 4         | 10        | 11        | 5         |
| Isoform 1 of Centrosomal protein of 72 kDa                                                                 | IPI00465040             | 2         | 14        | 8         | 12        | 13        | 11        |
| Molybdenum cofactor sulfurase                                                                              | IPI00304895             | 4         | 13        | 9         | 5         | 4         | 5         |
| Serine/threonine-protein kinase 12                                                                         | IPI00176642             | 2         | 8         | 6         | 5         | 4         | 5         |
| Transcription elongation factor B polypeptide 1                                                            | IPI00300341             | 3         | 5         | 4         | 4         | 4         | 3         |
| Isoform 1 of Protein-L-isoaspartate O-methyltransferase domain-containing protein 1                        | IPI00162744             | 3         | 5         | 4         | 3         | 2         | 3         |
| Stress-70 protein, mitochondrial                                                                           | IPI00007765             | 4         | 5         | 3         | 5         | 7         | 4         |
| Metalloproteinase inhibitor 3                                                                              | IPI00218247             | 1         | 4         | 2         | 3         | 3         | 4         |
| Isoform Short of Ubiquitin carboxyl-terminal hydrolase 25                                                  | IPI00219886             | 3         | 10        | 4         | 4         | 3         | 1         |
| Isoform 1 of Phosphatidylinositol-3,4,5-trisphosphate 5-phosphatase 2                                      | IPI00016932             | 9         | 0         | 0         | 7         | 10        | 2         |
| <b>Isoform 1 of Wings apart-like protein homolog</b>                                                       | <b>IPI00375330 (+2)</b> | <b>9</b>  | <b>1</b>  | <b>0</b>  | <b>11</b> | <b>8</b>  | <b>3</b>  |
| Isoform 1 of Clathrin heavy chain 1                                                                        | IPI00024067 (+1)        | 0         | 3         | 3         | 2         | 0         | 1         |
| Isoform 2 of Protein LSM14 homolog A                                                                       | IPI00410590 (+2)        | 0         | 4         | 4         | 1         | 1         | 2         |
| Tubulin, beta                                                                                              | IPI00645452 (+1)        | 1         | 5         | 4         | 2         | 2         | 3         |
| Isoform Non-muscle of Myosin light polypeptide 6                                                           | IPI00335168 (+3)        | 0         | 3         | 2         | 3         | 2         | 2         |
| Lipoamide acyltransferase component of branched-chain alpha-keto acid dehydrogenase complex, mitochondrial | IPI00003944             | 9         | 0         | 1         | 8         | 6         | 2         |
| THO complex subunit 4                                                                                      | IPI00328840             | 1         | 5         | 3         | 3         | 3         | 1         |
| Tubulin alpha-1A chain                                                                                     | IPI00180675 (+3)        | 3         | 5         | 3         | 3         | 1         | 3         |
| 60S acidic ribosomal protein P0                                                                            | IPI00008530             | 2         | 4         | 2         | 2         | 3         | 2         |
| Transcription elongation factor B polypeptide 2                                                            | IPI00026670 (+2)        | 1         | 1         | 3         | 1         | 2         | 2         |
| Isoform 1 of Cell division protein kinase 9                                                                | IPI00301923 (+1)        | 1         | 3         | 3         | 4         | 2         | 2         |
| 60S ribosomal protein L18                                                                                  | IPI00215719             | 2         | 2         | 2         | 3         | 2         | 3         |

|                                                                    |                         |          |          |          |          |          |          |
|--------------------------------------------------------------------|-------------------------|----------|----------|----------|----------|----------|----------|
| Heat shock 70 kDa protein 1A/1B                                    | IPI00304925 (+1)        | 1        | 5        | 2        | 1        | 2        | 2        |
| Isoform 1 of Polymerase I and transcript release factor            | IPI00176903 (+1)        | 2        | 3        | 3        | 2        | 1        | 1        |
| Thyroid hormone receptor-associated protein 3                      | IPI00104050             | 0        | 2        | 0        | 7        | 4        | 7        |
| 60S ribosomal protein L13                                          | IPI00465361             | 3        | 1        | 3        | 3        | 2        | 2        |
| <b>Cohesin subunit SA-1</b>                                        | <b>IPI00025158 (+1)</b> | <b>5</b> | <b>2</b> | <b>0</b> | <b>5</b> | <b>4</b> | <b>1</b> |
| Isoform 1 of 60S ribosomal protein L11                             | IPI00376798 (+1)        | 2        | 2        | 2        | 1        | 2        | 2        |
| Myosin regulatory light chain 12B                                  | IPI00033494 (+3)        | 1        | 3        | 1        | 2        | 1        | 1        |
| ATP-dependent RNA helicase DDX3X                                   | IPI00215637             | 0        | 5        | 1        | 3        | 1        | 1        |
| Isoform 1 of RNA-binding protein 39                                | IPI00163505 (+1)        | 0        | 5        | 3        | 1        | 0        | 1        |
| 60S ribosomal protein L7a                                          | IPI00299573 (+2)        | 2        | 2        | 2        | 2        | 2        | 1        |
| Histone H4                                                         | IPI00453473             | 3        | 2        | 2        | 3        | 2        | 2        |
| Nuclease-sensitive element-binding protein 1                       | IPI00031812             | 1        | 5        | 3        | 1        | 2        | 1        |
| Transcription factor ETV6                                          | IPI00013159             | 4        | 0        | 0        | 4        | 4        | 1        |
| Isoform 1 of N(2),N(2)-dimethylguanosine tRNA methyltransferase    | IPI00020508 (+1)        | 1        | 5        | 1        | 2        | 1        | 1        |
| 60S ribosomal protein L24                                          | IPI00306332 (+3)        | 0        | 3        | 2        | 1        | 1        | 1        |
| 60S acidic ribosomal protein P2                                    | IPI00008529             | 3        | 1        | 1        | 3        | 1        | 2        |
| 60S ribosomal protein L4                                           | IPI00003918             | 1        | 3        | 3        | 2        | 0        | 0        |
| Activated RNA polymerase II transcriptional coactivator p15        | IPI00221222             | 1        | 3        | 1        | 0        | 0        | 1        |
| Isoform C1 of Heterogeneous nuclear ribonucleoproteins C1/C2       | IPI00216592 (+3)        | 0        | 0        | 0        | 5        | 5        | 4        |
| Ribosomal protein L14 variant                                      | IPI00555744 (+2)        | 1        | 2        | 1        | 2        | 1        | 1        |
| Isoform 1 of 60S ribosomal protein L12                             | IPI00024933             | 1        | 1        | 2        | 1        | 2        | 1        |
| Isoform 1 of Bcl-2-associated transcription factor 1               | IPI00006079 (+4)        | 1        | 1        | 0        | 1        | 2        | 2        |
| Thyroid transcription factor 1-associated protein 26               | IPI00329594             | 2        | 2        | 0        | 2        | 0        | 1        |
| Enhancer of rudimentary homolog                                    | IPI00029631             | 0        | 1        | 1        | 2        | 0        | 2        |
| <b>PDS5, regulator of cohesin maintenance, homolog A isoform 2</b> | <b>IPI00303063 (+1)</b> | <b>3</b> | <b>0</b> | <b>0</b> | <b>3</b> | <b>4</b> | <b>1</b> |
| HSPA5 protein                                                      | IPI00003362             | 0        | 5        | 2        | 1        | 1        | 0        |
| 60S ribosomal protein L7                                           | IPI00030179 (+3)        | 1        | 2        | 2        | 1        | 1        | 1        |
| Vimentin                                                           | IPI00418471             | 1        | 0        | 0        | 2        | 3        | 1        |
| 40S ribosomal protein S10                                          | IPI00008438 (+1)        | 0        | 3        | 0        | 1        | 1        | 1        |
| Isoform 2 of Centrosomal protein of 97 kDa                         | IPI00238469 (+2)        | 0        | 3        | 2        | 0        | 0        | 0        |
| 40S ribosomal protein S25                                          | IPI00012750             | 1        | 1        | 2        | 1        | 1        | 1        |

Proteins identified from 1 h, 4 h and 16 h pre-digestion. 1 h and 4 h pre-digested samples were further digested over night. Spectra acquired on LTQ Orbitrap were searched against the human IPI database and compared using Scaffold Q+ software (v 3.0, Proteome Software). Listed are the identified proteins along with the number of unique peptides with a Mascot score >25; > 2 peptides in at least one elution. Cohesin subunits and known interactors are in bold. Sample amounts loaded onto column: 1 h Trypsin



pre-digestion 1/2 of eluate from immunoabsorption; 4 h Trypsin pre-digestion 1/2 of eluate; 16 h Trypsin pre-digestion 1/10<sup>th</sup> of eluate; 1 h LysC pre-digestion 1/2 of eluate; 4 h LysC pre-digestion 1/2 of eluate; 16 h of pre-digestion 1/4 of eluate

**Table S3**

| Protein                                                          | Accession Number        | Trypsin   |           |           | LysC      |           |           |
|------------------------------------------------------------------|-------------------------|-----------|-----------|-----------|-----------|-----------|-----------|
|                                                                  |                         | 1 h       | 4 h       | 16 h      | 1 h       | 4 h       | 16 h      |
| Isoform 1 of Plectin-1                                           | IPI00014898 (+7)        | 141       | 28        | 24        | 75        | 58        | 118       |
| Isoform 3 of Spectrin alpha chain, brain                         | IPI00843765             | 91        | 19        | 29        | 67        | 50        | 73        |
| Isoform 2 of Filamin-A                                           | IPI00302592 (+2)        | 64        | 18        | 19        | 64        | 48        | 57        |
| Isoform Long of Spectrin beta chain, brain 1                     | IPI00005614             | 78        | 18        | 21        | 64        | 46        | 72        |
| Actin, cytoplasmic 1                                             | IPI00021439 (+1)        | 15        | 7         | 8         | 12        | 12        | 11        |
| Isoform 1 of Myosin-9                                            | IPI00019502             | 61        | 18        | 14        | 34        | 33        | 47        |
| <b>Anaphase-promoting complex subunit 1</b>                      | <b>IPI00033907</b>      | <b>38</b> | <b>13</b> | <b>5</b>  | <b>39</b> | <b>36</b> | <b>31</b> |
| <b>Isoform 1 of Anaphase-promoting complex subunit 7</b>         | <b>IPI00008248 (+3)</b> | <b>20</b> | <b>8</b>  | <b>9</b>  | <b>20</b> | <b>19</b> | <b>21</b> |
| <b>Isoform 1 of Anaphase-promoting complex subunit 5</b>         | <b>IPI00008247</b>      | <b>23</b> | <b>9</b>  | <b>8</b>  | <b>23</b> | <b>21</b> | <b>18</b> |
| <b>Isoform 1 of Cell division cycle protein 23 homolog</b>       | <b>IPI00005822</b>      | <b>24</b> | <b>9</b>  | <b>10</b> | <b>24</b> | <b>21</b> | <b>20</b> |
| <b>Cell division cycle protein 27 homolog</b>                    | <b>IPI00294575 (+1)</b> | <b>17</b> | <b>5</b>  | <b>4</b>  | <b>18</b> | <b>19</b> | <b>16</b> |
| <b>Isoform 1 of Anaphase-promoting complex subunit 4</b>         | <b>IPI00002551 (+1)</b> | <b>18</b> | <b>11</b> | <b>2</b>  | <b>18</b> | <b>15</b> | <b>14</b> |
| <b>Isoform 1 of Anaphase-promoting complex subunit 2</b>         | <b>IPI00002549 (+1)</b> | <b>21</b> | <b>10</b> | <b>4</b>  | <b>22</b> | <b>18</b> | <b>20</b> |
| Isoform 5 of Caldesmon                                           | IPI00333771 (+1)        | 18        | 3         | 13        | 18        | 17        | 19        |
| Vimentin                                                         | IPI00418471             | 21        | 5         | 9         | 18        | 14        | 18        |
| filamin-B isoform 1                                              | IPI00900293             | 32        | 9         | 6         | 25        | 15        | 23        |
| <b>Isoform 1 of Cell division cycle protein 16 homolog</b>       | <b>IPI00022091 (+2)</b> | <b>11</b> | <b>8</b>  | <b>4</b>  | <b>15</b> | <b>15</b> | <b>13</b> |
| Keratin, type II cytoskeletal 1                                  | IPI00220327             | 21        | 7         | 10        | 8         | 10        | 21        |
| LIM domain and actin-binding protein 1 isoform a                 | IPI00883896 (+1)        | 11        | 2         | 5         | 13        | 10        | 9         |
| Keratin, type I cytoskeletal 9                                   | IPI00019359             | 18        | 4         | 7         | 8         | 4         | 15        |
| Alpha-actinin-4                                                  | IPI00013808             | 25        | 5         | 4         | 9         | 7         | 19        |
| Isoform 1 of Heat shock cognate 71 kDa protein                   | IPI00003865             | 15        | 7         | 4         | 18        | 17        | 12        |
| Isoform 1 of Drebrin                                             | IPI00003406 (+1)        | 14        | 2         | 5         | 14        | 10        | 12        |
| Tax_Id=9606 Gene_Symbol=TPM1 tropomyosin alpha-1 chain isoform 5 | IPI00970818             | 13        | 2         | 5         | 11        | 10        | 9         |
| Transferrin receptor protein 1                                   | IPI00022462             | 15        | 8         | 3         | 4         | 2         | 9         |
| <b>Anaphase-promoting complex subunit CDC26</b>                  | <b>IPI00169387</b>      | <b>3</b>  | <b>1</b>  | <b>2</b>  | <b>5</b>  | <b>5</b>  | <b>6</b>  |
| Keratin, type II cytoskeletal 2 epidermal                        | IPI00021304             | 16        | 4         | 5         | 1         | 1         | 18        |
| Tubulin alpha-1C chain                                           | IPI00218343             | 7         | 5         | 2         | 7         | 7         | 7         |
| Ras GTPase-activating-like protein                               | IPI00009342             | 22        | 5         | 0         | 5         | 1         | 11        |

IQGAP1

|                                                                                      |                         |          |          |          |          |          |          |
|--------------------------------------------------------------------------------------|-------------------------|----------|----------|----------|----------|----------|----------|
| Isoform 2 of Tropomyosin alpha-3 chain                                               | IPI00218319 (+1)        | 8        | 2        | 3        | 10       | 6        | 7        |
| Isoform 2 of 4F2 cell-surface antigen heavy chain                                    | IPI00027493 (+5)        | 11       | 4        | 0        | 7        | 6        | 12       |
| Isoform 1 of Myoferlin                                                               | IPI00021048 (+1)        | 19       | 4        | 2        | 2        | 1        | 12       |
| Isoform 1 of Nexilin                                                                 | IPI00180404 (+1)        | 10       | 4        | 5        | 11       | 6        | 9        |
| Tubulin beta-2C chain                                                                | IPI00007752             | 7        | 3        | 4        | 10       | 8        | 6        |
| Isoform 2 of Annexin A2                                                              | IPI00418169 (+1)        | 10       | 1        | 1        | 8        | 6        | 8        |
| Isoform 2 of Fizzy-related protein homolog                                           | IPI00099464             | 8        | 0        | 2        | 15       | 9        | 5        |
| Isoform 1 of Protein-L-isoaspartate O-methyltransferase domain-containing protein 2  | IPI00884185             | 7        | 1        | 0        | 9        | 9        | 6        |
| Isoform 1 of Brain acid soluble protein 1                                            | IPI00299024             | 8        | 1        | 4        | 10       | 8        | 8        |
| <b>Anaphase-promoting complex subunit 10</b>                                         | <b>IPI00007088</b>      | <b>5</b> | <b>2</b> | <b>2</b> | <b>5</b> | <b>4</b> | <b>4</b> |
| Isoform 1 of Spectrin beta chain, brain 2                                            | IPI00012645             | 18       | 2        | 3        | 3        | 3        | 5        |
| Isoform 1 of Protein-L-isoaspartate(D-aspartate) O-methyltransferase                 | IPI00411680             | 7        | 2        | 3        | 6        | 4        | 6        |
| Isoform 1 of Myosin-Ib                                                               | IPI00376344 (+2)        | 11       | 2        | 1        | 4        | 0        | 8        |
| Isoform 4 of A-kinase anchor protein 2                                               | IPI00816415             | 13       | 0        | 0        | 3        | 4        | 9        |
| Isoform 1 of Tropomyosin beta chain                                                  | IPI00013991             | 5        | 2        | 1        | 5        | 4        | 4        |
| HSPA5 protein                                                                        | IPI00003362             | 10       | 2        | 0        | 9        | 6        | 6        |
| Heat shock protein HSP 90-beta Neuroblast differentiation-associated protein AHNAK   | IPI00414676             | 6        | 0        | 1        | 7        | 4        | 5        |
| cDNA FLJ45706 fis, clone FEBRA2028457, highly similar to Nucleolin                   | IPI00021812             | 6        | 2        | 1        | 5        | 2        | 7        |
| Heat shock 70 kDa protein 1A/1B                                                      | IPI00444262 (+1)        | 5        | 3        | 2        | 8        | 3        | 5        |
| DEP domain-containing protein 1B cDNA FLJ55574, highly similar to Calnexin           | IPI00304925 (+2)        | 6        | 3        | 0        | 6        | 6        | 5        |
| Serine/threonine-protein phosphatase PP1-alpha catalytic subunit                     | IPI00293897             | 5        | 4        | 0        | 10       | 6        | 3        |
| <b>Anaphase-promoting complex subunit 16</b>                                         | <b>IPI00020984 (+1)</b> | <b>8</b> | <b>1</b> | <b>1</b> | <b>4</b> | <b>1</b> | <b>6</b> |
| Isoform 1 of Clathrin heavy chain 1                                                  | <b>IPI00550451</b>      | <b>6</b> | <b>2</b> | <b>2</b> | <b>4</b> | <b>3</b> | <b>5</b> |
| Transcription elongation factor B polypeptide 1                                      | <b>IPI00060893</b>      | <b>4</b> | <b>1</b> | <b>1</b> | <b>3</b> | <b>3</b> | <b>3</b> |
| Actin filament-associated protein 1 similar to actin alpha 1 skeletal muscle protein | IPI00024067 (+1)        | 10       | 1        | 1        | 2        | 2        | 4        |
| F-box only protein 5                                                                 | IPI00300341             | 5        | 0        | 1        | 4        | 4        | 2        |
| Isoform Non-muscle of Myosin light polypeptide 6                                     | IPI00398154 (+1)        | 6        | 1        | 1        | 1        | 1        | 5        |
| Isoform 1 of Phostensin                                                              | IPI00886911 (+1)        | 1        | 0        | 1        | 1        | 1        | 1        |
| Isoform 1 of Serine/threonine-protein kinase Nek2                                    | IPI00016633             | 3        | 0        | 0        | 7        | 5        | 1        |
| Isoform 1 of Protein-L-isoaspartate O-methyltransferase domain-containing protein 1  | IPI00335168 (+3)        | 5        | 0        | 1        | 4        | 3        | 4        |
| Ras-related protein Rab-11B                                                          | IPI00152853 (+1)        | 5        | 0        | 1        | 3        | 1        | 4        |
| Keratin, type II cytoskeletal 5                                                      | IPI00021331             | 5        | 0        | 0        | 7        | 3        | 4        |
| haptoglobin isoform 2 preproprotein                                                  | IPI00162744             | 4        | 1        | 0        | 3        | 3        | 2        |
| Isoform 1 of Protein phosphatase 1                                                   | IPI00020436 (+4)        | 5        | 2        | 2        | 2        | 1        | 5        |
|                                                                                      | IPI00009867             | 8        | 1        | 0        | 0        | 0        | 4        |
|                                                                                      | IPI00478493 (+2)        | 0        | 0        | 0        | 0        | 0        | 1        |
|                                                                                      | IPI00183002             | 9        | 2        | 1        | 1        | 1        | 3        |

regulatory subunit 12A

|                                                                      |                  |   |   |   |   |   |   |
|----------------------------------------------------------------------|------------------|---|---|---|---|---|---|
| Histone H4                                                           | IPI00453473      | 4 | 1 | 1 | 4 | 4 | 4 |
| Cytospin-A                                                           | IPI00178072      | 6 | 2 | 0 | 1 | 0 | 4 |
| Calmodulin                                                           | IPI00075248 (+4) | 3 | 1 | 2 | 2 | 2 | 3 |
| Elongation factor 1-alpha                                            | IPI00025447 (+2) | 5 | 0 | 0 | 3 | 1 | 1 |
| 60S ribosomal protein L7a                                            | IPI00299573 (+2) | 3 | 3 | 0 | 3 | 2 | 3 |
| Ras-related protein Rab-7a                                           | IPI00016342      | 4 | 2 | 0 | 1 | 1 | 3 |
| HLA class I histocompatibility antigen, A-68 alpha chain             | IPI00472882      | 3 | 2 | 1 | 0 | 1 | 4 |
| Tubulin, beta                                                        | IPI00645452      | 2 | 2 | 1 | 3 | 1 | 2 |
| Nuclease-sensitive element-binding protein 1                         | IPI00031812 (+1) | 2 | 0 | 2 | 4 | 4 | 1 |
| Isoform 1 of 60S ribosomal protein L12                               | IPI00024933      | 3 | 2 | 1 | 2 | 2 | 2 |
| Myosin regulatory light chain 12B                                    | IPI00033494 (+4) | 3 | 1 | 0 | 4 | 2 | 4 |
| 40S ribosomal protein S6                                             | IPI00021840      | 3 | 0 | 0 | 3 | 2 | 2 |
| Putative uncharacterized protein IFI35                               | IPI00008613 (+2) | 4 | 0 | 0 | 3 | 1 | 1 |
| 60S ribosomal protein L23                                            | IPI00010153 (+1) | 2 | 1 | 0 | 2 | 1 | 1 |
| Thyroid hormone receptor-associated protein 3                        | IPI00104050      | 0 | 0 | 0 | 7 | 8 | 1 |
| Histone H1.2                                                         | IPI00217465 (+2) | 3 | 2 | 1 | 3 | 3 | 3 |
| Cell division cycle protein 20 homolog                               | IPI00329526      | 2 | 2 | 0 | 3 | 1 | 2 |
| 60S acidic ribosomal protein P0                                      | IPI00008530      | 4 | 0 | 0 | 2 | 1 | 2 |
| 40S ribosomal protein S4, X isoform                                  | IPI00217030      | 4 | 0 | 0 | 2 | 3 | 2 |
| Keratin, type II cytoskeletal 7                                      | IPI00306959      | 4 | 2 | 0 | 1 | 0 | 5 |
| 60S ribosomal protein L13                                            | IPI00465361      | 2 | 2 | 0 | 2 | 2 | 2 |
| Protein FAM101B                                                      | IPI00166945      | 3 | 1 | 0 | 2 | 2 | 3 |
| Isoform 1 of Tropomyosin alpha-4 chain                               | IPI00010779      | 2 | 0 | 1 | 2 | 2 | 2 |
| N-myc-interactor                                                     | IPI00012450      | 2 | 2 | 0 | 4 | 2 | 1 |
| Annexin A5                                                           | IPI00329801 (+1) | 4 | 2 | 0 | 2 | 0 | 1 |
| Isoform 1 of Ras-related protein Rab-1A                              | IPI00005719 (+1) | 4 | 0 | 0 | 0 | 1 | 1 |
| Isoform Long of Sodium/potassium-transporting ATPase subunit alpha-1 | IPI00006482 (+1) | 6 | 1 | 0 | 0 | 0 | 2 |
| Isoform 1 of 60S ribosomal protein L11                               | IPI00376798 (+1) | 3 | 1 | 1 | 3 | 3 | 1 |
| Ras-related protein Rap-1b                                           | IPI00015148      | 3 | 1 | 2 | 2 | 1 | 2 |
| 60S ribosomal protein L4                                             | IPI00003918      | 2 | 1 | 1 | 3 | 2 | 2 |
| Coronin-1C_i3 protein                                                | IPI00867509 (+1) | 3 | 0 | 1 | 3 | 1 | 3 |
| Isoform DPI of Desmoplakin                                           | IPI00013933      | 5 | 1 | 2 | 1 | 0 | 0 |
| 60S ribosomal protein L18                                            | IPI00215719      | 2 | 1 | 1 | 3 | 2 | 2 |
| 60S ribosomal protein L27a                                           | IPI00456758      | 2 | 1 | 0 | 2 | 2 | 1 |
| A kinase (PRKA) anchor protein 2                                     | IPI00073769      | 3 | 0 | 0 | 3 | 2 | 4 |
| 60S ribosomal protein L6                                             | IPI00329389 (+2) | 2 | 0 | 1 | 3 | 0 | 0 |
| 60S ribosomal protein L24                                            | IPI00306332 (+3) | 1 | 0 | 0 | 2 | 1 | 1 |
| Annexin A6                                                           | IPI00221226 (+1) | 5 | 1 | 1 | 0 | 0 | 3 |
| Peroxiredoxin-1                                                      | IPI00000874 (+1) | 3 | 1 | 0 | 0 | 0 | 0 |
| Guanine nucleotide-binding protein G(I)/G(S)/G(T) subunit beta-2     | IPI00003348      | 3 | 0 | 1 | 1 | 1 | 2 |
| 40S ribosomal protein S16                                            | IPI00221092      | 2 | 0 | 0 | 3 | 2 | 1 |
| Annexin A1                                                           | IPI00218918      | 3 | 2 | 0 | 0 | 0 | 1 |
| Isoform 1 of Leucine-rich repeat flightless-interacting protein 2    | IPI00007277 (+3) | 4 | 0 | 0 | 1 | 0 | 2 |

|                                                                           |                    |          |          |          |          |          |          |
|---------------------------------------------------------------------------|--------------------|----------|----------|----------|----------|----------|----------|
| epiplakin                                                                 | IPI00010951        | 4        | 0        | 0        | 0        | 0        | 2        |
| 60S ribosomal protein L7                                                  | IPI00030179 (+2)   | 2        | 0        | 1        | 1        | 1        | 2        |
| Isoform 1 of Myosin-XVIIIa                                                | IPI00760846 (+2)   | 4        | 1        | 0        | 0        | 0        | 3        |
| Stress-70 protein, mitochondrial                                          | IPI00007765        | 5        | 1        | 0        | 2        | 1        | 1        |
| Microtubule-actin cross-linking factor 1, isoform 4                       | IPI00432363        | 3        | 1        | 0        | 0        | 0        | 1        |
| 60S ribosomal protein L3                                                  | IPI00550021 (+2)   | 1        | 0        | 0        | 3        | 3        | 1        |
| Tropomyosin 1 alpha variant 6                                             | IPI00384369        | 2        | 0        | 1        | 2        | 2        | 2        |
| Isoform 2 of Nucleophosmin                                                | IPI00220740 (+2)   | 2        | 0        | 0        | 1        | 1        | 1        |
| Isoform 1 of L-lactate dehydrogenase A chain                              | IPI00217966 (+3)   | 2        | 0        | 0        | 3        | 2        | 1        |
| Isoform 2 of Reticulon-4                                                  | IPI00298289        | 3        | 1        | 0        | 1        | 0        | 1        |
| Coronin-2A                                                                | IPI00023736        | 3        | 0        | 0        | 1        | 1        | 3        |
| 60S ribosomal protein L8                                                  | IPI00012772 (+2)   | 2        | 1        | 1        | 2        | 2        | 2        |
| Isoform 2 of Heat shock protein HSP 90-alpha                              | IPI00382470 (+1)   | 3        | 2        | 0        | 2        | 2        | 1        |
| 40S ribosomal protein S14                                                 | IPI00026271        | 2        | 0        | 0        | 2        | 1        | 0        |
| Isoform 2 of Tropomyosin beta chain                                       | IPI00220709        | 1        | 0        | 1        | 1        | 1        | 2        |
| Isoform 1 of S-phase kinase-associated protein 1                          | IPI00301364        | 2        | 0        | 0        | 2        | 2        | 1        |
| Isoform 1 of Vesicle-associated membrane protein 7                        | IPI00020887 (+1)   | 4        | 1        | 0        | 0        | 0        | 2        |
| neurabin-2                                                                | IPI00045550        | 5        | 0        | 1        | 0        | 0        | 2        |
| Coiled-coil domain-containing protein 96                                  | IPI00166414        | 1        | 0        | 1        | 1        | 1        | 1        |
| 17 kDa protein                                                            | IPI00173589 (+2)   | 2        | 0        | 0        | 2        | 2        | 1        |
| <b>Anaphase-promoting complex subunit 13</b>                              | <b>IPI00029244</b> | <b>2</b> | <b>1</b> | <b>0</b> | <b>2</b> | <b>2</b> | <b>2</b> |
| Tropomodulin-3                                                            | IPI00005087        | 4        | 2        | 1        | 0        | 1        | 1        |
| 60S ribosomal protein L23a                                                | IPI00021266 (+4)   | 2        | 0        | 1        | 2        | 0        | 2        |
| Isoform 1 of Heterogeneous nuclear ribonucleoprotein M                    | IPI00171903 (+1)   | 2        | 0        | 0        | 0        | 0        | 2        |
| 40S ribosomal protein S7                                                  | IPI00013415 (+3)   | 1        | 0        | 0        | 0        | 2        | 0        |
| Isoform 1 of Mitotic checkpoint serine/threonine-protein kinase BUB1 beta | IPI00141933 (+3)   | 0        | 0        | 0        | 5        | 3        | 0        |
| Isoform 1 of Heterogeneous nuclear ribonucleoprotein U-like protein 1     | IPI00013070 (+2)   | 0        | 0        | 0        | 5        | 2        | 1        |
| 40S ribosomal protein S19                                                 | IPI00215780        | 1        | 1        | 0        | 0        | 0        | 2        |
| Pyrroline-5-carboxylate reductase 2                                       | IPI00470610        | 1        | 0        | 0        | 3        | 3        | 1        |
| Histone H2A type 1-B/E                                                    | IPI00026272 (+10)  | 0        | 0        | 0        | 0        | 1        | 0        |
| Isoform 2 of Ankycorbin                                                   | IPI00292953 (+5)   | 3        | 0        | 1        | 0        | 0        | 2        |
| Galectin-1                                                                | IPI00219219        | 1        | 0        | 0        | 0        | 0        | 2        |
| Keratin, type I cytoskeletal 14                                           | IPI00384444        | 4        | 0        | 0        | 0        | 0        | 2        |
| Protein kinase, cAMP-dependent, regulatory, type II, alpha, isoform CRA_b | IPI00063234 (+1)   | 4        | 0        | 0        | 0        | 0        | 1        |
| Isoform 2 of Myosin-Ic                                                    | IPI00010418 (+2)   | 3        | 0        | 0        | 0        | 0        | 0        |
| Isoform 2 of Tropomyosin alpha-4 chain                                    | IPI00216975        | 2        | 0        | 1        | 1        | 1        | 1        |
| Dermcidin                                                                 | IPI00027547 (+1)   | 2        | 1        | 0        | 0        | 0        | 2        |

Proteins identified from 1 h, 4 h and 16 h pre-digestion. 1 h and 4 h pre-digested samples were further digested over night. Spectra acquired on LTQ Orbitrap were searched against the human IPI database

and compared using Scaffold Q+ software (v 3.0, Proteome Software). Listed are the identified proteins along with the number of unique peptides with a Mascot score >25; > 2 peptides in at least one elution. Cohesin subunits and known interactors are in bold. Sample amounts loaded onto column: 1 h Trypsin pre-digestion 1/2 of eluate from immunoabsorption; 4 h Trypsin pre-digestion 1/4 of eluate; 16 h Trypsin pre-digestion 1/10<sup>th</sup> of eluate; 1 h LysC pre-digestion 1/2 of eluate; 4 h LysC pre-digestion 1/2 of eluate; 16 h of pre-digestion 1/2 of eluate

**Table S4**

| Protein                                                                             | Accession Number        | 15 min    | 30 min    | 60 min    |
|-------------------------------------------------------------------------------------|-------------------------|-----------|-----------|-----------|
| <b>Structural maintenance of chromosomes protein 1A</b>                             | <b>IPI00291939</b>      | <b>74</b> | <b>71</b> | <b>64</b> |
| <b>Structural maintenance of chromosomes protein 3</b>                              | <b>IPI00219420</b>      | <b>63</b> | <b>60</b> | <b>64</b> |
| <b>cohesin subunit SA-2 isoform a</b>                                               | <b>IPI00470883</b>      | <b>34</b> | <b>32</b> | <b>32</b> |
| <b>Double-strand-break repair protein rad21 homolog</b>                             | <b>IPI00006715</b>      | <b>22</b> | <b>23</b> | <b>23</b> |
| Actin, cytoplasmic 1                                                                | IPI00021439 (+4)        | 10        | 9         | 9         |
| Isoform 1 of Protein-L-isoaspartate(D-aspartate) O-methyltransferase                | IPI00411680 (+2)        | 5         | 6         | 6         |
| Isoform 1 of Protein-L-isoaspartate O-methyltransferase domain-containing protein 2 | IPI00884185             | 8         | 6         | 5         |
| Transcription elongation factor B polypeptide 2                                     | IPI00026670 (+2)        | 7         | 6         | 5         |
| <b>Isoform 1 of Wings apart-like protein homolog</b>                                | <b>IPI00375330 (+2)</b> | <b>6</b>  | <b>5</b>  | <b>5</b>  |
| <b>PDS5, regulator of cohesion maintenance, homolog A isoform 2</b>                 | <b>IPI00303063 (+1)</b> | <b>5</b>  | <b>4</b>  | <b>4</b>  |
| Transcription elongation factor B polypeptide 1                                     | IPI00300341 (+1)        | 2         | 2         | 3         |
| Isoform 2 of Nucleophosmin                                                          | IPI00220740 (+2)        | 3         | 3         | 1         |
| 2-oxoglutarate dehydrogenase, mitochondrial                                         | IPI00098902 (+4)        | 2         | 3         | 2         |
| 165 kDa protein                                                                     | IPI00240812 (+2)        | 4         | 2         | 1         |
| <b>Cohesin subunit SA-1</b>                                                         | <b>IPI00025158 (+1)</b> | <b>4</b>  | <b>3</b>  | <b>4</b>  |
| Isoform 1 of Protein-L-isoaspartate O-methyltransferase domain-containing protein 1 | IPI00162744             | 1         | 2         | 2         |
| Isoform 1 of Dynein heavy chain 10, axonemal                                        | IPI00784869             | 2         | 0         | 2         |
| Stress-70 protein, mitochondrial                                                    | IPI00007765             | 1         | 2         | 1         |
| ubiquitin and ribosomal protein L40 precursor                                       | IPI00456429             | 2         | 1         | 0         |
| Translational activator GCN1                                                        | IPI00001159             | 1         | 2         | 2         |
| Isoform 1 of Gephyrin                                                               | IPI00016006 (+2)        | 2         | 1         | 0         |
| Zinc finger and BTB domain-containing protein 3                                     | IPI00165014             | 2         | 0         | 1         |
| Molybdenum cofactor sulfurase                                                       | IPI00304895             | 2         | 1         | 0         |
| Arginase-2, mitochondrial                                                           | IPI00020332             | 1         | 2         | 0         |
| Isoform 1 of Heat shock cognate 71 kDa protein                                      | IPI00003865             | 3         | 0         | 0         |

Proteins identified from 15, 30 and 60 min LysC elution. Spectra acquired on LTQ Orbitrap were searched against the human IPI database and compared using Scaffold Q+ software (v 3.0, Proteome Software). Listed are the identified proteins along with the number of unique peptides with a Mascot score >25; > 2 peptides in at least one elution. Cohesin subunits and known interactors are in bold.

## Results obtained using trypsin to perform protease elution.

Due to the fact that only the LysC – trypsin double digest led to complete sample digestion as judged by the standard deviation of measured peptides within one subunit and by the low number of identified missed cleavage sites in LC-MS/MS experiments, only the LysC elution is discussed in the main article. Results obtained using trypsin to perform protease elution are discussed here.

**Figure S11**

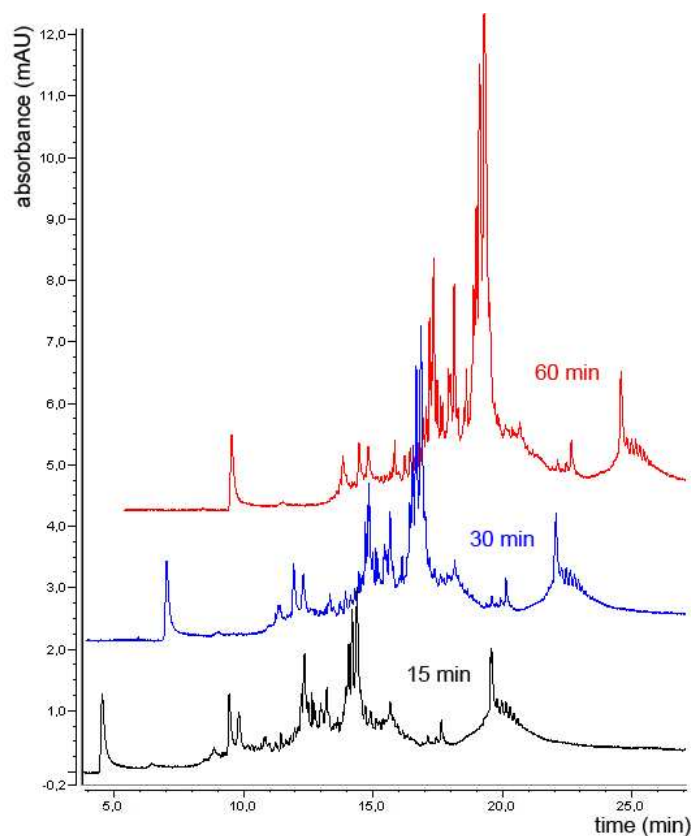

Trypsin elution performed analog to LysC elution experiment shown in figure 3b. Cohesin was purified using  $\alpha$ RAD21 antibody beads and protease elution was performed by addition of 500 ng trypsin to 30  $\mu$ l antibody beads re-suspended in 60  $\mu$ l 0.5 M TEAB. After 15, 30 and 60 min of incubation at 37°C an aliquot was separated using a monolithic column. In contrast to LysC elution signal intensity increases from the 15 min to 60 min time point. As absolute quantification of cohesin peptides did not show an increase in cohesin from the 15 to 60 min time point (Figure S9) the increase in signal intensity can most

likely explained by cleaved antibody peptides (note: in this experiment approximately 50x the amount of material was loaded compared to experiment shown in figure 1a & 1c).

**Figure S12**

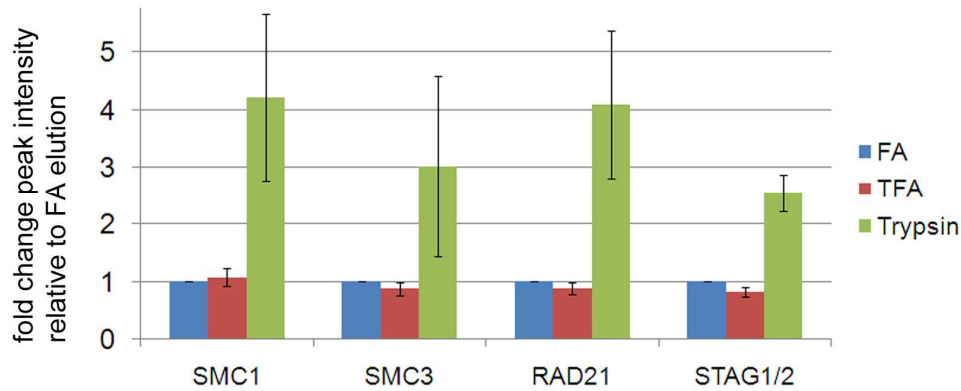

Labelfree quantification of cohesin subunits by XIC from preparations using different elution protocols relative to FA elution. Data are the mean  $\pm$  S.D. of relative measurements of peptides that were identified in all 5 preparations (depending on the size of the subunit but  $>5$ ). Single measurement.

**Figure S13**

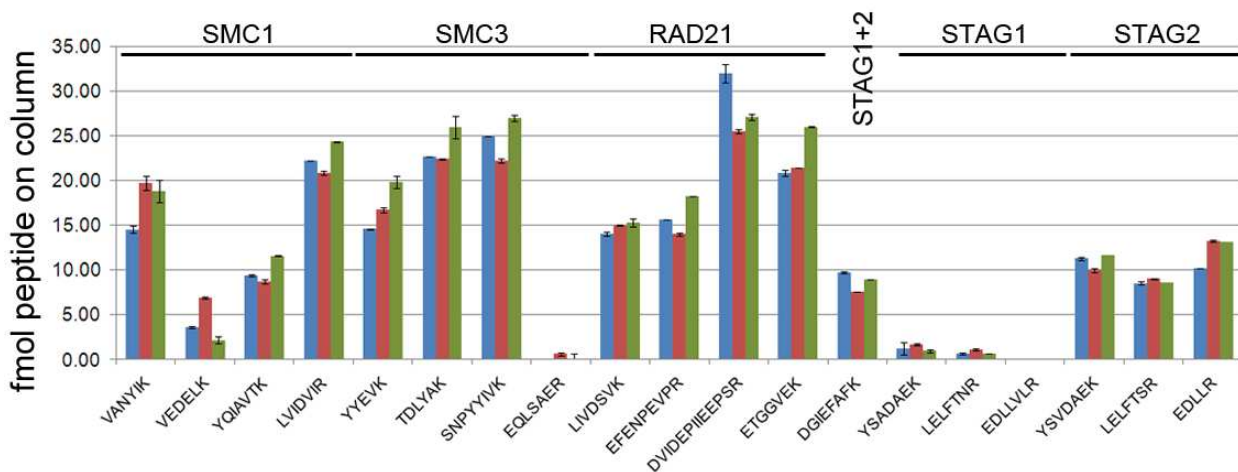

Absolute quantification of SMC1, SMC3, RAD21 and STAG1, STAG2 peptides using scheduled SRM on a 5500 QTRAP after 15, 30 and 60 min trypsin elution. Measurements are mean  $\pm$  S.D. of duplicate measurements. The strong scattering of measured peptides within one subunit indicates incomplete digestion.
